# Supplementary material for: Loss of PTEN stabilizes the lipid modifying enzyme cytosolic phospholipase A2α via AKT in prostate cancer cells
Source: PubMed Central journal article supplement (PMC4171630; doi:10.18632/oncotarget.2198), 2014-07-09
Supplement: oncotarget-05-6289-s001.pdf [file oncotarget-05-6289-s001.pdf]

## Loss of PTEN stabilizes the lipid modifying enzyme cytosolic phospholipase A2 $\alpha$ *via* AKT in prostate cancer cells

Supplementary Material

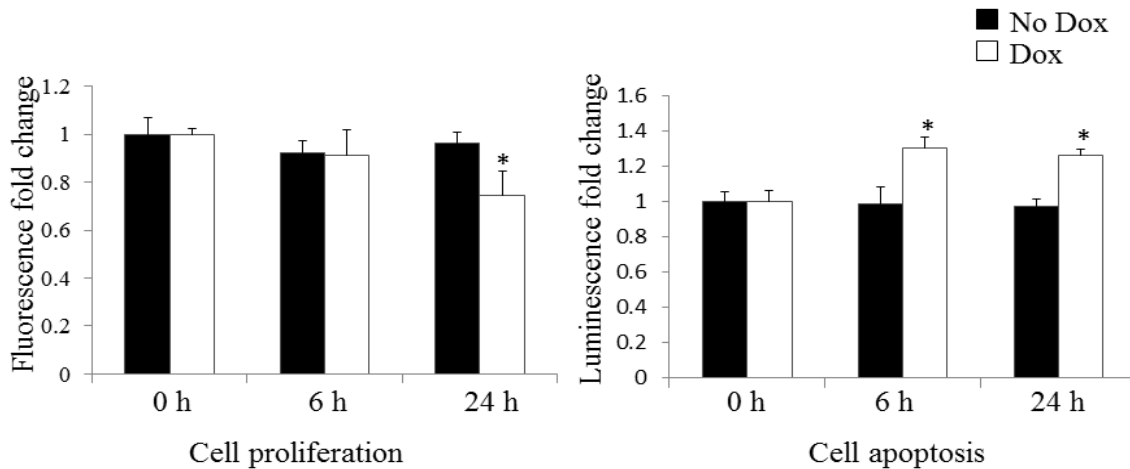

Figure S1: LNCaP cells transfected with Dox-controlled inducible PTEN expression system were treated with or without Dox (100 ng/mL) for 24 h. Apolive-Glo Multiplex assays (Promega) were used to determine the effect of PTEN expression on cell proliferation (a) and apoptosis (b). Results represented as the mean  $\pm$  SD. \*  $P < 0.05$  versus no Dox treatment.

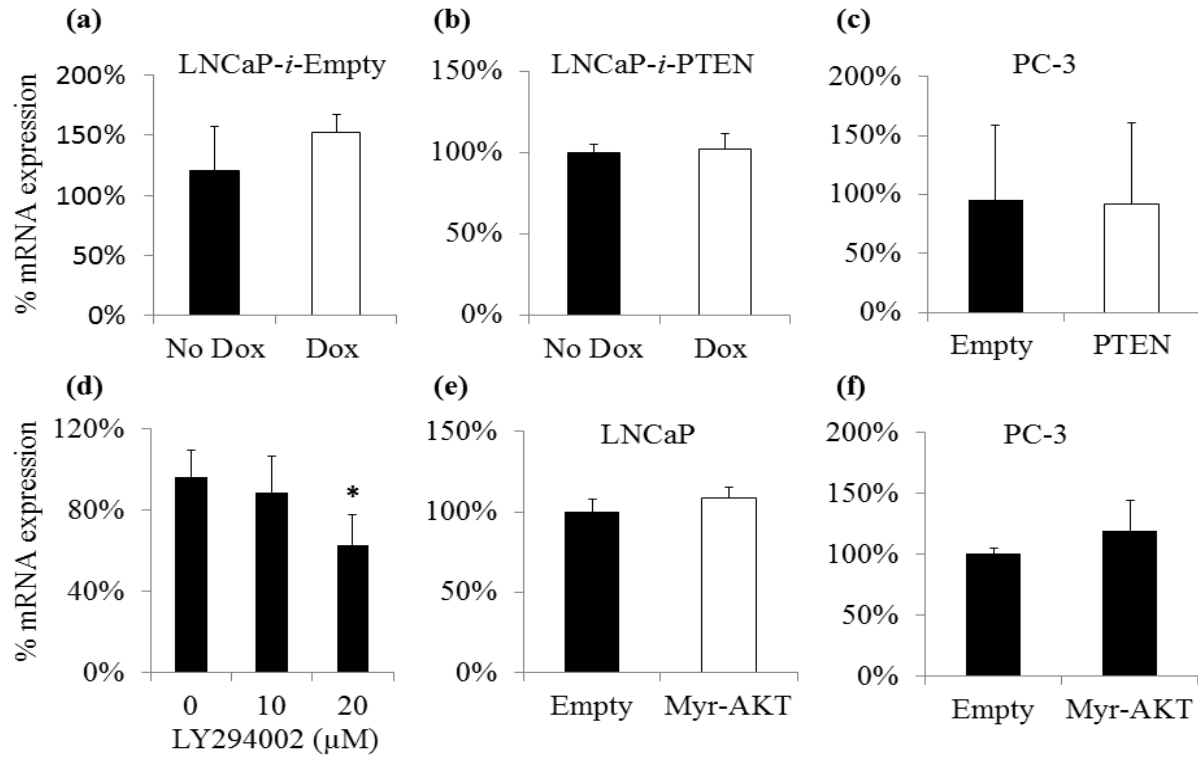

Figure S2: Restoration of PTEN expression, inhibition of PI3K, or over-expression of Myr-AKT on cPLA<sub>2</sub>α mRNA levels by RT-qPCR. The experimental cells as described for immunoblotting were harvested. Total RNA was extracted followed by reverse transcription and quantitative real-time PCR as described under Methods. The Relative Expression Software Tool 2009 (Qiagen) was used to calculate relative changes in cPLA<sub>2</sub>α normalized to the housekeeping gene (TBP). Amplification efficiency was determined using a 5-point dilution curve and was within 100% ± 3% for cPLA<sub>2</sub>α and TBP. \* P<0.05 versus control.

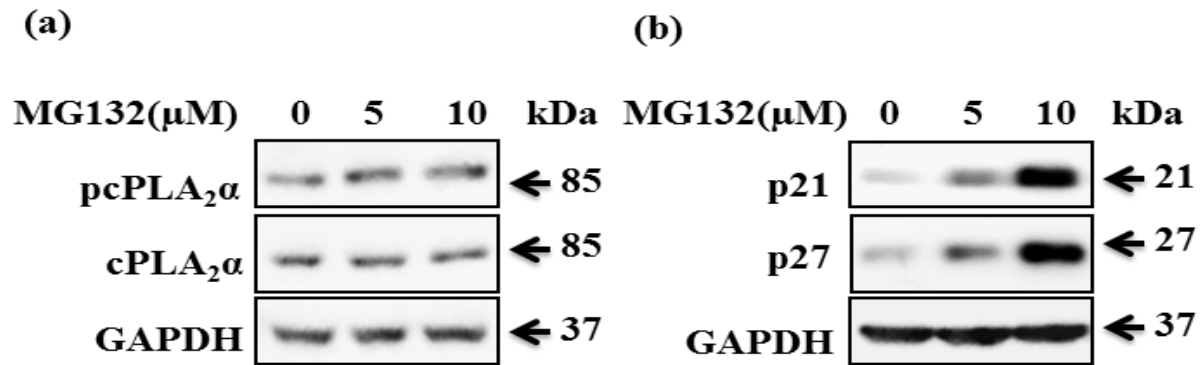

Figure S3: Effect of protease inhibitor MG132 on cPLA<sub>2</sub> $\alpha$  protein levels. PC-3 cells were treated with the indicated dose of MG132 for 24 h. The cells were harvested and subjected to immunoblot analysis. MG132 had little effect on cPLA<sub>2</sub> $\alpha$  (a) but clearly increased p21 and p27(b).

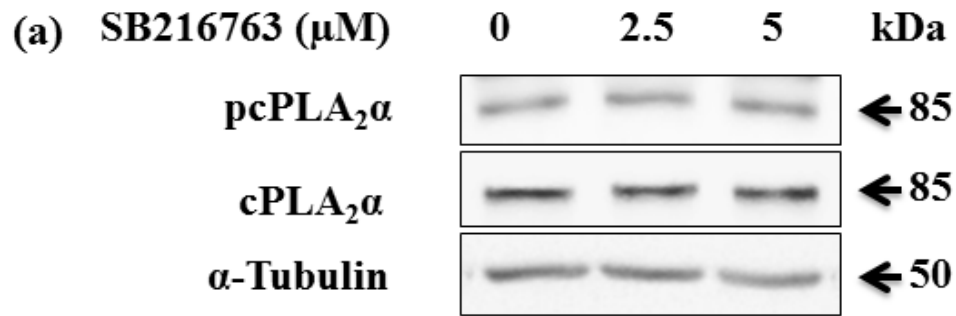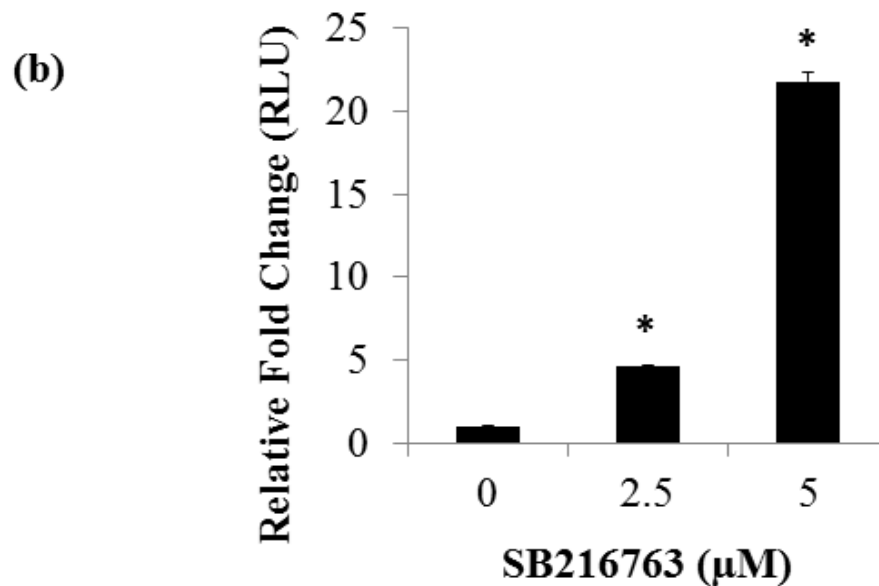

Figure S4: The effect of blocking GSK3 $\beta$  (the immediate downstream effector of AKT) on cPLA<sub>2</sub> $\alpha$ . To differentiate whether AKT per se or its target proteins impinge on cPLA<sub>2</sub> $\alpha$ , PC-3 cells treated with the indicated dose of GSK3 $\beta$  inhibitor for 24 h and subjected to immunoblot (a). Total and pcPLA<sub>2</sub> $\alpha$  proteins levels were unchanged despite the successful inhibition of GSK3 $\beta$  as shown by the dual luciferase activity of TCF/LEF (TOPO-Flash) promoter assay measuring  $\beta$ -catenin activity (b).
